# Supplementary material for: The Early ANTP Gene Repertoire: Insights from the Placozoan Genome
Source: PubMed Central journal article supplement (PMC2515636; doi:10.1371/journal.pone.0002457), 2008-08-21

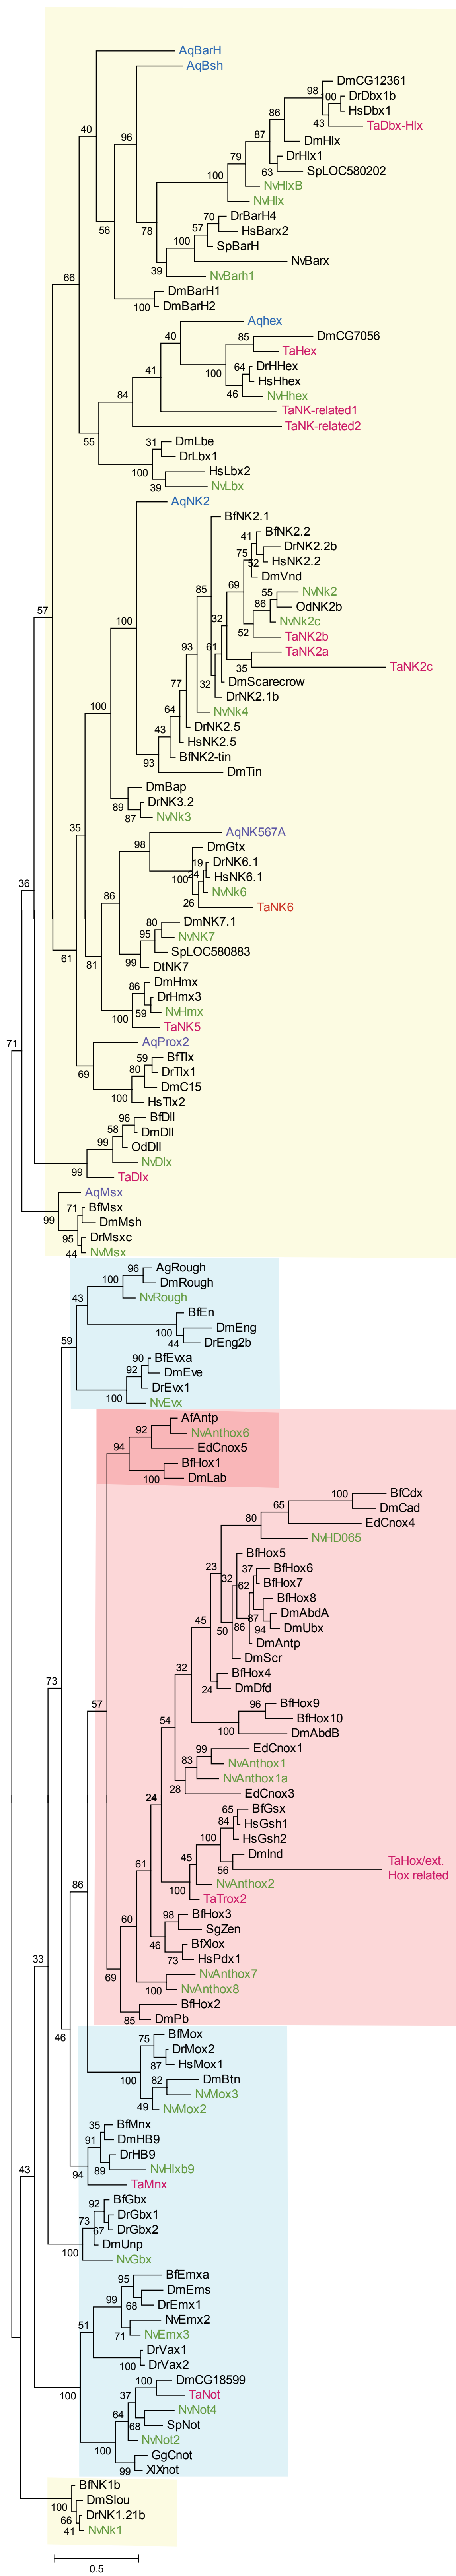

Supplement: pone.0002457.s001.pdf [file pone.0002457.s001.pdf]
